# Supplementary material
Source: PubMed Central journal article supplement (PMC6488010)
Supplement: jamaotolaryngolheadnecksurg-145-530-s001.pdf [file jamaotolaryngolheadnecksurg-145-530-s001.pdf]

## Supplementary Online Content

Kim SY, Kong IG, Min C, Choi HG. Association of air pollution with increased risk of peritonsillar abscess formation [published online April 25, 2019]. *JAMA Otolaryngol Head Neck Surg*. doi:10.1001/jamaoto.2019.0742

### eMethods

#### Meteorological Data

**eTable 1.** Crude odd ratios (95% confidence intervals) of the meteorological and pollution matter for peritonsillar abscess formation

**eTable 2.** Akaike Information Criterion and Bayesian Information Criterion of the pollution matter in crude logistic regression analysis for peritonsillar abscess formation

**eTable 3.** Correlation analysis of pollution matter

**eTable 4.** Adjusted odd ratios (95% confidence interval) of PM10 for 14 days (10 µg/m<sup>3</sup>) for peritonsillar abscess in subgroup analysis according to age and sex

This supplementary material has been provided by the authors to give readers additional information about their work.

## **Air pollution increases the risk of peritonsillar abscess formation: A nested case-control study using meteorological data and national sample cohort data**

### **eMethods: Study Population and Data Collection**

This national cohort study used data from the Korean Health Insurance Review and Assessment Service - National Sample Cohort (HIRA-NSC). The Korean National Health Insurance Service (NHIS) selects samples directly from the entire population database to prevent nonsampling errors. Approximately 2% of the samples (one million) were selected from the entire Korean population (50 million). The selected data were classified at 1,476 levels (age [18 categories], sex [2 categories], and income [41 categories]) using randomized stratified systematic sampling methods with proportional allocation to represent the entire population. After data selection, the appropriateness of the sample was verified by a statistician who compared the data from the entire Korean population to the sample data. The details of the methods used to perform these procedures are provided by the National Health Insurance Sharing Service (<http://nhiss.nhis.or.kr/>). The database included (i) personal information, (ii) health insurance claim codes (procedures and prescriptions), (iii) diagnostic codes using the International Classification of Disease-10 (ICD-10), (iv) death records from the Korean National Statistical Office (using the Korean Standard Classification of disease), (v) socioeconomic data (residence and income), and (vi) medical examination data for each participant over a period ranging from 2002 to 2013.

Because all Korean citizens are recognized by a 13-digit resident registration number from birth to death, exact population statistics can be determined using this database. It is mandatory for all Koreans to enroll in the NHIS. All Korean hospitals and clinics use the 13-digit resident registration number to register individual patients in the medical insurance

© 2019 American Medical Association. All rights reserved.

system. Therefore, the risk of overlapping medical records is minimal, even if a patient moves from one place to another. Moreover, all medical treatments in Korea are tracked using the HIRA system. In Korea, a notice of death to an administrative entity is legally required before a funeral can be held. Causes and dates of death are recorded by medical doctors on death certificates.

### **Meteorological Data**

Temperature (°C), relative humidity (%), and spot atmospheric pressure (hPa) data were obtained from the meteorological administration using an automated synoptic observing system (ASOS) that manually recorded measurements in 94 places each hour. Quality was controlled using a quality inspection manual (<https://data.kma.go.kr/cmmn/main.do>).

SO<sub>2</sub> (ppm), NO<sub>2</sub> (ppm), O<sub>3</sub> (ppm), CO (ppm), and PM<sub>10</sub> (µg/m<sup>3</sup>) data were obtained by the ministry of the environment. Measurements were obtained by ASOS in 273 places across the country each hour. Quality was controlled using an air pollution quality control manual (<http://www.me.go.kr/home/web/index.do?menuId=10259>). Daily mean values were assessed.

**eTable 1** Crude odd ratios (95% confidence intervals) of the meteorological and pollution matter for peritonsillar abscess formation

| Characteristics                               | Peritonsillar abscess |         |
|-----------------------------------------------|-----------------------|---------|
|                                               | Crude OR (95% CI)     | P-value |
| Mean daily temperature for 14 days (°C)       | 1.00 (0.99-1.00)      | 0.289   |
| Mean daily temperature for 10 days (°C)       | 1.00 (0.99-1.00)      | 0.312   |
| Mean daily temperature for 7 days (°C)        | 1.00 (0.99-1.00)      | 0.296   |
| Mean daily temperature for 5 days (°C)        | 1.00 (0.99-1.00)      | 0.284   |
| Mean daily temperature for 3 days (°C)        | 1.00 (0.99-1.00)      | 0.289   |
| Highest daily temperature for 14 days (°C)    | 1.00 (0.99-1.00)      | 0.293   |
| Highest daily temperature for 10 days (°C)    | 1.00 (0.99-1.00)      | 0.323   |
| Highest daily temperature for 7 days (°C)     | 1.00 (0.99-1.00)      | 0.305   |
| Highest daily temperature for 5 days (°C)     | 1.00 (0.99-1.00)      | 0.303   |
| Highest daily temperature for 3 days (°C)     | 1.00 (0.99-1.00)      | 0.315   |
| Lowest daily temperature for 14 days (°C)     | 1.00 (1.00-1.00)      | 0.316   |
| Lowest daily temperature for 10 days (°C)     | 1.00 (1.00-1.00)      | 0.340   |
| Lowest daily temperature for 7 days (°C)      | 1.00 (1.00-1.00)      | 0.330   |
| Lowest daily temperature for 5 days (°C)      | 1.00 (1.00-1.00)      | 0.308   |
| Lowest daily temperature for 3 days (°C)      | 1.00 (1.00-1.00)      | 0.301   |
| Daily temperature difference for 14 days (°C) | 1.00 (0.99-1.02)      | 0.918   |
| Daily temperature difference for 10 days (°C) | 1.00 (0.99-1.02)      | 0.895   |
| Daily temperature difference for 7 days (°C)  | 1.00 (0.99-1.01)      | 0.958   |

|                                              |                   |         |
|----------------------------------------------|-------------------|---------|
| Daily temperature difference for 5 days (°C) | 1.00 (0.99-1.02)  | 0.839   |
| Daily temperature difference for 3 days (°C) | 1.00 (0.99-1.01)  | 0.758   |
| Relative humidity for 14 days (%)            | 1.00 (1.00-1.00)  | 0.943   |
| Relative humidity for 10 days (%)            | 1.00 (1.00-1.00)  | 0.861   |
| Relative humidity for 7 days (%)             | 1.00 (1.00-1.00)  | 0.845   |
| Relative humidity for 5 days (%)             | 1.00 (1.00-1.00)  | 0.747   |
| Relative humidity for 3 days (%)             | 1.00 (1.00-1.00)  | 0.755   |
| Spot atmospheric pressure for 14 days (hPa)  | 1.00 (1.00-1.01)  | 0.261   |
| Spot atmospheric pressure for 10 days (hPa)  | 1.00 (1.00-1.01)  | 0.279   |
| Spot atmospheric pressure for 7 days (hPa)   | 1.00 (1.00-1.01)  | 0.257   |
| Spot atmospheric pressure for 5 days (hPa)   | 1.00 (1.00-1.01)  | 0.261   |
| Spot atmospheric pressure for 3 days (hPa)   | 1.00 (1.00-1.01)  | 0.265   |
| SO <sub>2</sub> for 14 days (0.1 ppm)        | 0.97 (0.17-5.64)  | 0.972   |
| SO <sub>2</sub> for 10 days (0.1 ppm)        | 1.35 (0.24-7.54)  | 0.736   |
| SO <sub>2</sub> for 7 days (0.1 ppm)         | 1.21 (0.23-6.40)  | 0.823   |
| SO <sub>2</sub> for 5 days (0.1 ppm)         | 1.48 (0.30-7.36)  | 0.636   |
| SO <sub>2</sub> for 3 days (0.1 ppm)         | 1.69 (0.37-7.71)  | 0.496   |
| NO <sub>2</sub> for 14 days (0.1 ppm)        | 9.92 (6.65-14.80) | <0.001* |
| NO <sub>2</sub> for 10 days (0.1 ppm)        | 9.65 (6.51-14.30) | <0.001* |
| NO <sub>2</sub> for 7 days (0.1 ppm)         | 7.91 (5.41-11.56) | <0.001* |
| NO <sub>2</sub> for 5 days (0.1 ppm)         | 6.57 (4.57-9.44)  | <0.001* |
| NO <sub>2</sub> for 3 days (0.1 ppm)         | 5.38 (3.84-7.54)  | <0.001* |
| O <sub>3</sub> for 14 days (0.1 ppm)         | 0.34 (0.23-0.52)  | <0.001* |
| O <sub>3</sub> for 10 days (0.1 ppm)         | 0.35 (0.24-0.54)  | <0.001* |

|                                                      |                  |         |
|------------------------------------------------------|------------------|---------|
| O <sub>3</sub> for 7 days (0.1 ppm)                  | 0.35 (0.24-0.53) | <0.001* |
| O <sub>3</sub> for 5 days (0.1 ppm)                  | 0.38 (0.26-0.56) | <0.001* |
| O <sub>3</sub> for 3 days (0.1 ppm)                  | 0.40 (0.28-0.58) | <0.001* |
| CO for 14 days (1 ppm)                               | 1.01 (0.85-1.21) | 0.893   |
| CO for 10 days (1 ppm)                               | 1.03 (0.86-1.23) | 0.759   |
| CO for 7 days (1 ppm)                                | 1.01 (0.85-1.19) | 0.954   |
| CO for 5 days (1 ppm)                                | 1.00 (0.85-1.18) | 1.000   |
| CO for 3 days (1 ppm)                                | 1.03 (0.88-1.20) | 0.733   |
| PM <sub>10</sub> for 14 days (10 µg/m <sup>3</sup> ) | 1.04 (1.02-1.06) | <0.001* |
| PM <sub>10</sub> for 10 days (10 µg/m <sup>3</sup> ) | 1.03 (1.02-1.05) | <0.001* |
| PM <sub>10</sub> for 7 days (10 µg/m <sup>3</sup> )  | 1.03 (1.01-1.04) | <0.001* |
| PM <sub>10</sub> for 5 days (10 µg/m <sup>3</sup> )  | 1.02 (1.01-1.04) | 0.002   |
| PM <sub>10</sub> for 3 days (10 µg/m <sup>3</sup> )  | 1.02 (1.01-1.03) | 0.005   |

\* Logistic regression model, significance at P < 0.05

We analyzed the odd ratios of meteorological data for peritonsillar abscess formation using a simple logistic regression analysis. In these results, only NO<sub>2</sub>, O<sub>3</sub>, and PM<sub>10</sub> showed statistical significance (P < 0.05). Therefore, we chose these factors, namely, NO<sub>2</sub>, O<sub>3</sub>, and PM<sub>10</sub>, as independent variables.

**eTable 2** Akaike Information Criterion and Bayesian Information Criterion of the pollution matter in crude logistic regression analysis for peritonsillar abscess formation

| Pollution matter                                  | AIC       | BIC       |
|---------------------------------------------------|-----------|-----------|
| NO <sub>2</sub> for 14 days (0.1 ppm)             | 18989.101 | 19004.815 |
| NO <sub>2</sub> for 10 days (0.1 ppm)             | 18987.856 | 19003.571 |
| NO <sub>2</sub> for 7 days (0.1 ppm)              | 19001.714 | 19017.428 |
| NO <sub>2</sub> for 5 days (0.1 ppm)              | 19012.742 | 19028.456 |
| NO <sub>2</sub> for 3 days (0.1 ppm)              | 19020.570 | 19036.284 |
| O <sub>3</sub> for 14 days (0.1 ppm)              | 19089.118 | 19104.832 |
| O <sub>3</sub> for 10 days (0.1 ppm)              | 19089.750 | 19105.465 |
| O <sub>3</sub> for 7 days (0.1 ppm)               | 19088.582 | 19104.296 |
| O <sub>3</sub> for 5 days (0.1 ppm)               | 19090.305 | 19106.019 |
| O <sub>3</sub> for 3 days (0.1 ppm)               | 19091.047 | 19106.761 |
| PM <sub>10</sub> for 14 days (µg/m <sup>3</sup> ) | 19098.964 | 19114.678 |
| PM <sub>10</sub> for 10 days (µg/m <sup>3</sup> ) | 19100.021 | 19115.736 |
| PM <sub>10</sub> for 7 days (µg/m <sup>3</sup> )  | 19103.580 | 19119.295 |
| PM <sub>10</sub> for 5 days (µg/m <sup>3</sup> )  | 19104.918 | 19120.633 |
| PM <sub>10</sub> for 3 days (µg/m <sup>3</sup> )  | 19106.786 | 19122.501 |

AIC: Akaike Information Criterion

BIC: Bayesian Information Criterion

NO<sub>2</sub>, O<sub>3</sub>, and PM<sub>10</sub> (for 14 days, 10 days, 7 days, 5 days, and 3 days prior to the matched index date) all showed statistical significance (S2 table); thus, we chose only one of these factors.

For NO<sub>2</sub>, the AIC and BIC showed the smallest value at 14 days prior to the matched index date. We chose the mean NO<sub>2</sub> at 14 days before the index date.

For PM<sub>10</sub> at 14 days prior to the matched index date, the smallest AIC and BIC were observed. We chose the mean PM<sub>10</sub> at 14 days before the index date.

For O<sub>3</sub> at 7 days prior to the matched index date, the smallest AIC and BIC were observed.

However, we chose the value at 14 days before the index date because we selected that date for NO<sub>2</sub> and PM<sub>10</sub>.



**eTable 3** Correlation analysis of pollution matter

|                              | NO <sub>2</sub> for 14 days | O <sub>3</sub> for 14 days | PM <sub>10</sub> for 14 days |
|------------------------------|-----------------------------|----------------------------|------------------------------|
| NO <sub>2</sub> for 14 days  | 1                           | -0.434*                    | 0.520*                       |
| O <sub>3</sub> for 14 days   | -0.434*                     | 1                          | 0.005                        |
| PM <sub>10</sub> for 14 days | 0.520*                      | 0.005                      | 1                            |

\* Significance at  $P < 0.01$

In this analysis, the NO<sub>2</sub> showed the correlation of moderate intensity ( $0.3 < |r| < 0.7$ ) with

O<sub>3</sub> and PM<sub>10</sub>

**eTable 4** Adjusted odd ratios (95% confidence interval) of PM<sub>10</sub> for 14 days (10 µg/m<sup>3</sup>) for peritonsillar abscess in subgroup analysis according to age and sex

| Subgroup                     | N (participants) | Peritonsillar abscess  |         |
|------------------------------|------------------|------------------------|---------|
|                              |                  | AOR of NO <sub>2</sub> | P-value |
| Total                        | 19,210           | 1.04 (1.02-1.06)       | <0.001* |
| Age (<30 years old), men     | 4,235            | 1.04 (1.00-1.09)       | 0.052   |
| Age (<30 years old), women   | 3,175            | 1.02 (0.98-1.07)       | 0.389   |
| Age (30-59 years old), men   | 6,380            | 1.05 (1.02-1.08)       | 0.004*I |
| Age (30-59 years old), women | 3,955            | 1.04 (1.00-1.08)       | 0.053   |
| Age (≥ 60 years old), men    | 645              | 1.04 (0.912-1.18)      | 0.575   |
| Age (≥ 60 years old), women  | 705              | 1.02 (0.91-1.14)       | 0.756   |

\*Logistic regression model adjusted model for age, sex, income, region of residence, hypertension, diabetes, and dyslipidemia, Significance at P < 0.05
